# Supplementary material for: PHF7 is a novel histone H2A E3 ligase prior to histone-to-protamine exchange during spermiogenesis
Source: Oxford University Press journal article supplement (doi:10.1242/dev.175547), 2019-01-01
Supplement: dev175547supp.pdf [file dev175547supp.pdf]

## Supplementary Figures

Figure S1.

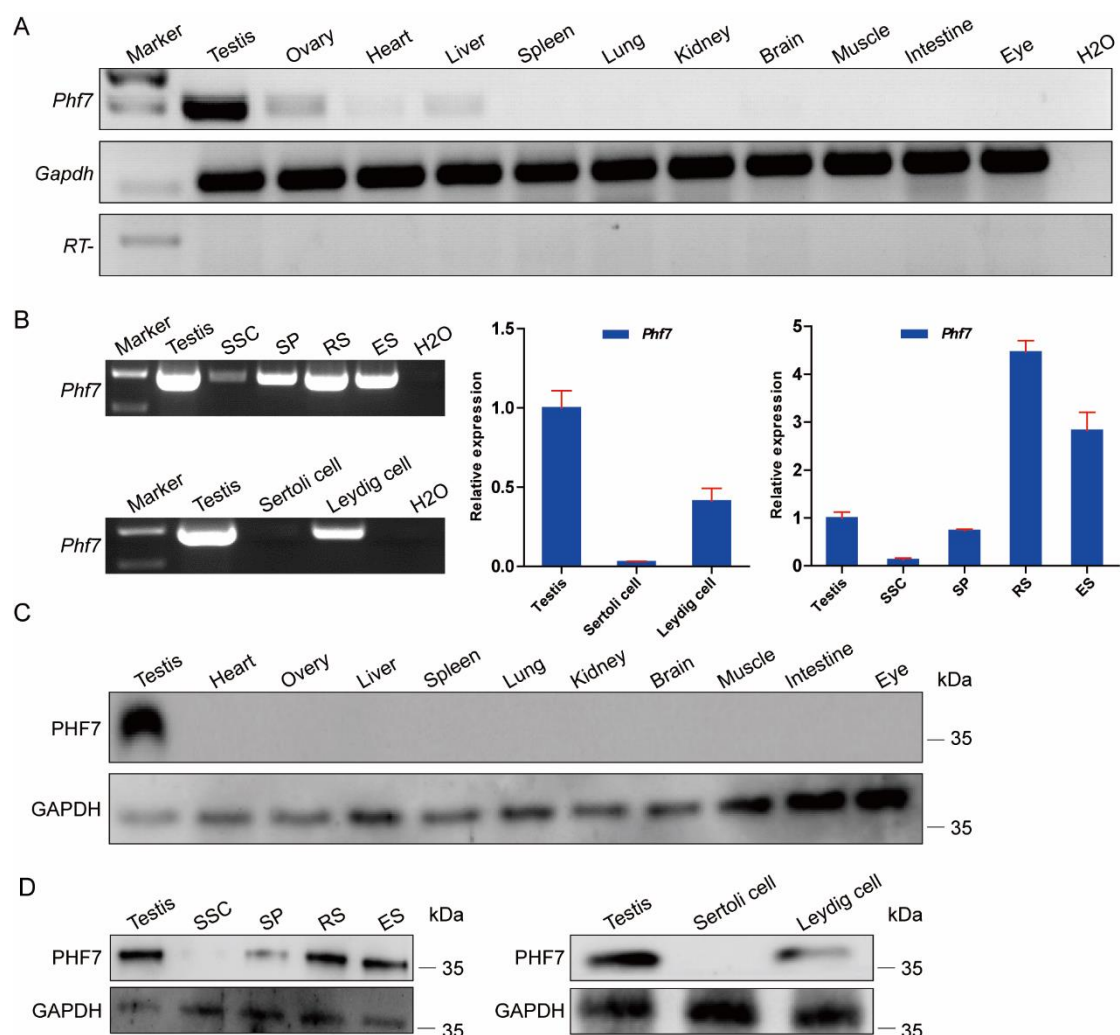**Figure S1. PHF7 is Specifically Expressed in Spermatids.**

- (A) Determination of *Phf7* transcript levels in different tissues by qPCR. RT- represents RNA used as the template in PCR reactions.
- (B) Determination of *Phf7* transcript levels in different testicular cells by real-time quantitative PCR (RT-qPCR). The left panels show the representative electrophoresis images of RT-qPCR results, and the last lane (H2O) is the blank control. The right two panels are the quantitative results from the left panels,

- normalized to the average transcript level of *Phf7* in testis. SSC, spermatogonial stem cells; SP, spermatocytes; RS, round spermatids; ES, elongating spermatids.
- (C) Western blot of PHF7 in different tissues. The tissues were dissociated from WT mice and treated in lysis buffer for SDS-PAGE gels, with GAPDH as a loading control.
- (D) Western blot of PHF7 in different testicular cells with GAPDH as a loading control.

**Figure S2.**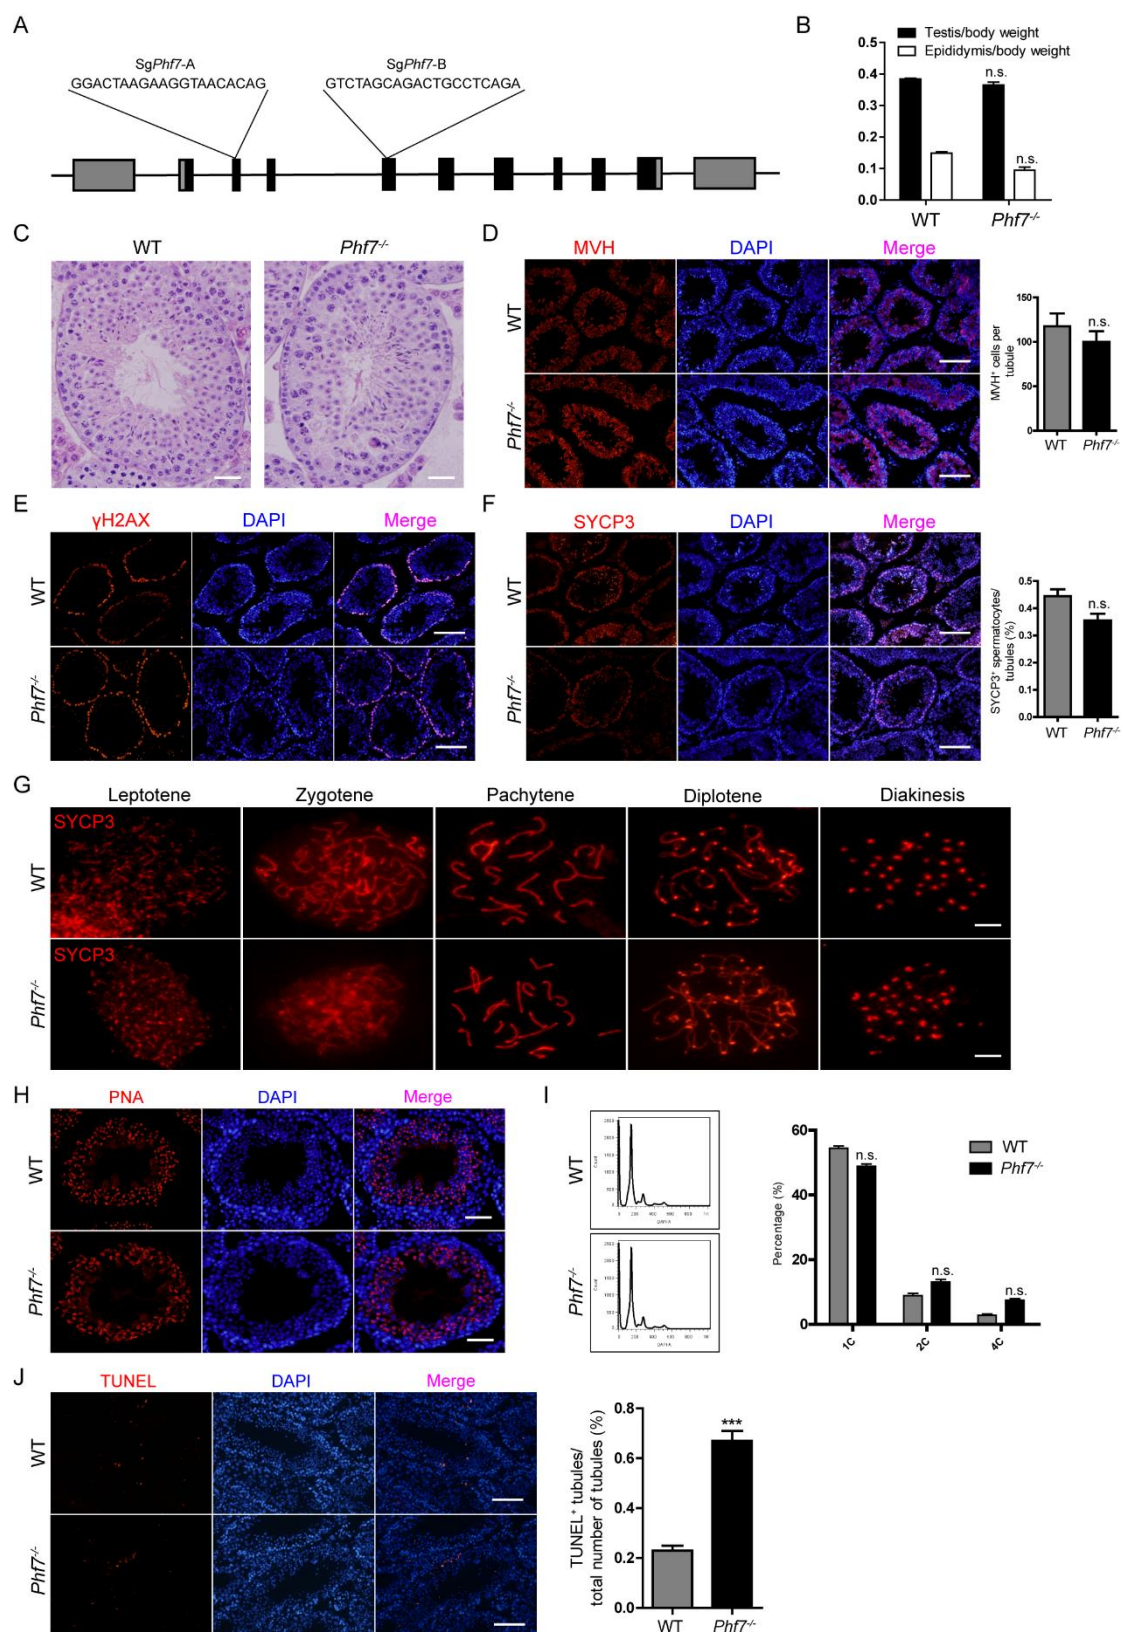

## Figure S2. Generation and Characterization of *Phf7* Mutant Mice.

- (A) Schematic for CRISPR-Cas9-mediated *Phf7* knockout in mice. SgRNA-A and sgRNA-B were designed to target exon 2 and 4 of *Phf7*, respectively.
- (B) Comparison of testis/body and epididymis/body weight between WT and *Phf7*<sup>-/-</sup> mice. The average values ± SD of three separate experiments are plotted. n.s., not significant.
- (C) Representative H&E staining images of WT and *Phf7*<sup>-/-</sup> testis. Scale bar, 50 μm.
- (D) Immunostaining of MVH (red) in testis sections from 8-week-old WT and *Phf7*<sup>-/-</sup> mice with nuclei counterstained with DAPI (blue). The number of MVH<sup>+</sup> cells *per* tubule are shown in the right panel. n.s., not significant. Scale bar, 100 μm.
- (E) Immunostaining of γH2A (red) in testis sections from WT and *Phf7*<sup>-/-</sup> 8-week-old mice. Scale bar, 100 μm.
- (F) Immunostaining of SYCP3 (red) in testis sections from WT and *Phf7*<sup>-/-</sup> 8-week-old mice. The ratios of SYCP3<sup>+</sup> spermatocytes *per* tubule are shown in the right panel. n.s., not significant. Scale bar, 100 μm.
- (G) SYCP3 antibody (red) immunostaining of meiotic chromosome spreads of spermatocytes at different stages. Scale bar, 100 μm.
- (H) Immunostaining of PNA in WT and *Phf7*<sup>-/-</sup> testes from 8-week-old mice. Testis sections were stained with PNA (red) to indicate acrosome formation. Nuclei were stained with DAPI (blue). Scale bar, 50 μm.
- (I) FACS analysis of the ratio of haploid cells in testes from WT and *Phf7*<sup>-/-</sup> 8-week-old mice. The percentage of 1C, 2C, and 4C cells in the testes are shown in the right panel. n.s., not significant.
- (J) TUNEL assay of testis sections from 8-week-old *Phf7*<sup>-/-</sup> and WT mice. Testis sections were stained with TUNEL (red) to indicate apoptosis. Nuclei were stained with DAPI (blue). The number of TUNEL<sup>+</sup> tubules and the total number of tubules are shown in the right panel. \*\*\*, *P* < 0.001. Scale bar, 50 μm.



**Figure S3.**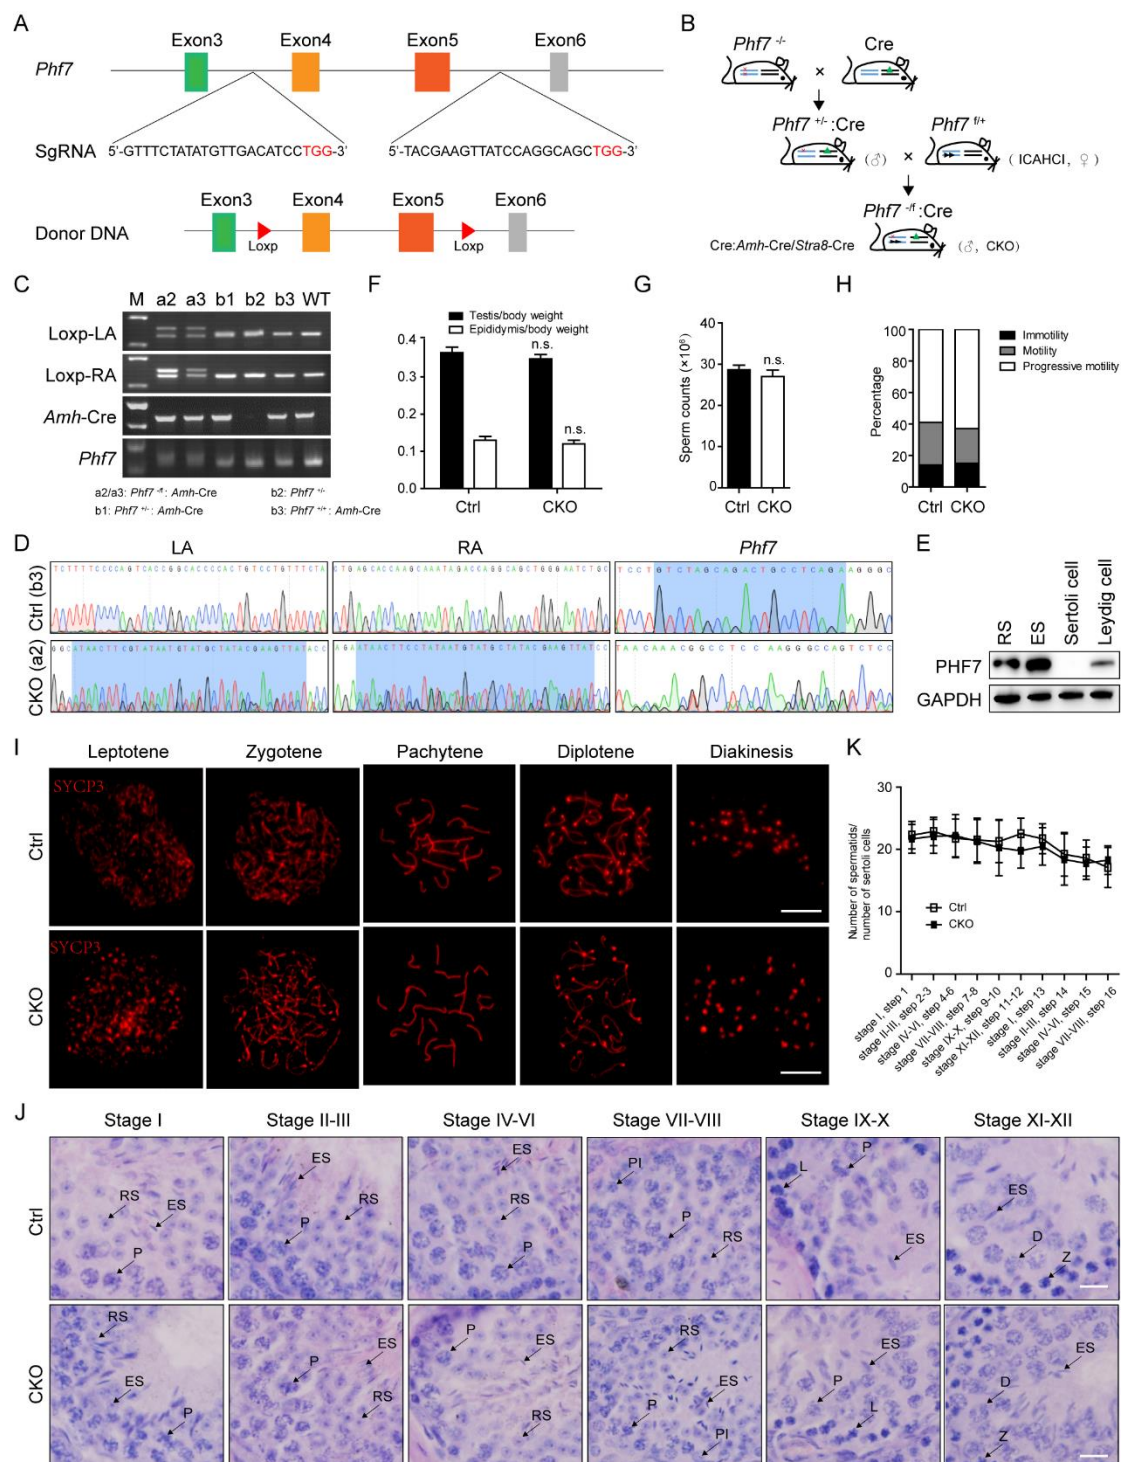

### Figure S3. Generation and Characterization of Mice Carrying Mutant *Phf7* in Sertoli Cells.

- (A) A schematic illustrating the construction of *Phf7*-loxp mice. The donor DNA with Loxp sequences was knocked into targeted loci to abolish exon 4 and 5 of *Phf7*. The sequences of two sgRNAs are shown and the PAM is marked in red.
- (B) A schematic illustrating the generation of conditional knockout mice by crossing *Phf7*-Loxp mice with mice carrying a *Cre* transgene .
- (C) PCR analysis of tail DNA from mice obtained by crossing *Phf7*-Loxp mice with *Amh*-Cre mice. LA and RA represent the left and right arm of Loxp, respectively. a2, a3, b1, b2, and b3 represent the different pups.
- (D) DNA sequences of PCR products (C) amplified from the LA, RA, and *Phf7* locus in two mice (a2 and b3), respectively. Two peaks can be observed in the LA, RA and *Phf7* locus of mouse a2 (CKO), while only one peak can be observed in mouse b3 (control).
- (E) Western blot of PHF7 in different testicular cells from mouse a2 (CKO). GAPDH is a loading control.
- (F) Comparison of the ratios of testis/body and epididymis/body weight between 10-week-old CKO and control littermates. The average values  $\pm$  SD of three separate experiments are plotted. n.s., not significant.
- (G) Sperm counts in cauda epididymes from 10-week-old CKO and control mice. n.s., not significant.
- (H) CASA analysis of immotility, motility, and progressive motility of sperm from 10-week-old CKO mice generated by *Amh*-Cre.
- (I) SYCP3 antibody (red) immunostaining of meiotic chromosome spreads of spermatocytes from 10-week-old CKO mice at different stages. Scale bar, 10  $\mu$ m.
- (J) H&E staining of testis sections from 8-week-old mice carrying mutant *Phf7* in Sertoli cells. Stages of seminiferous epithelium cycles were determined by

morphology of spermatocytes and round spermatids. PI, preleptotene; L, leptotene; Z, zygotene; P, pachytene; D, diplotene; RS, round spermatids; ES, elongating spermatids. Scale bar, 20  $\mu$ m.

- (K) The number of spermatids at different stages are comparable between CKO and control littermate mice during spermiogenesis. Ratios of spermatids and Sertoli cells in tubule cross sections from specific stages of the seminiferous epithelial cycles and corresponding spermatid development steps are shown.

**Figure S4.**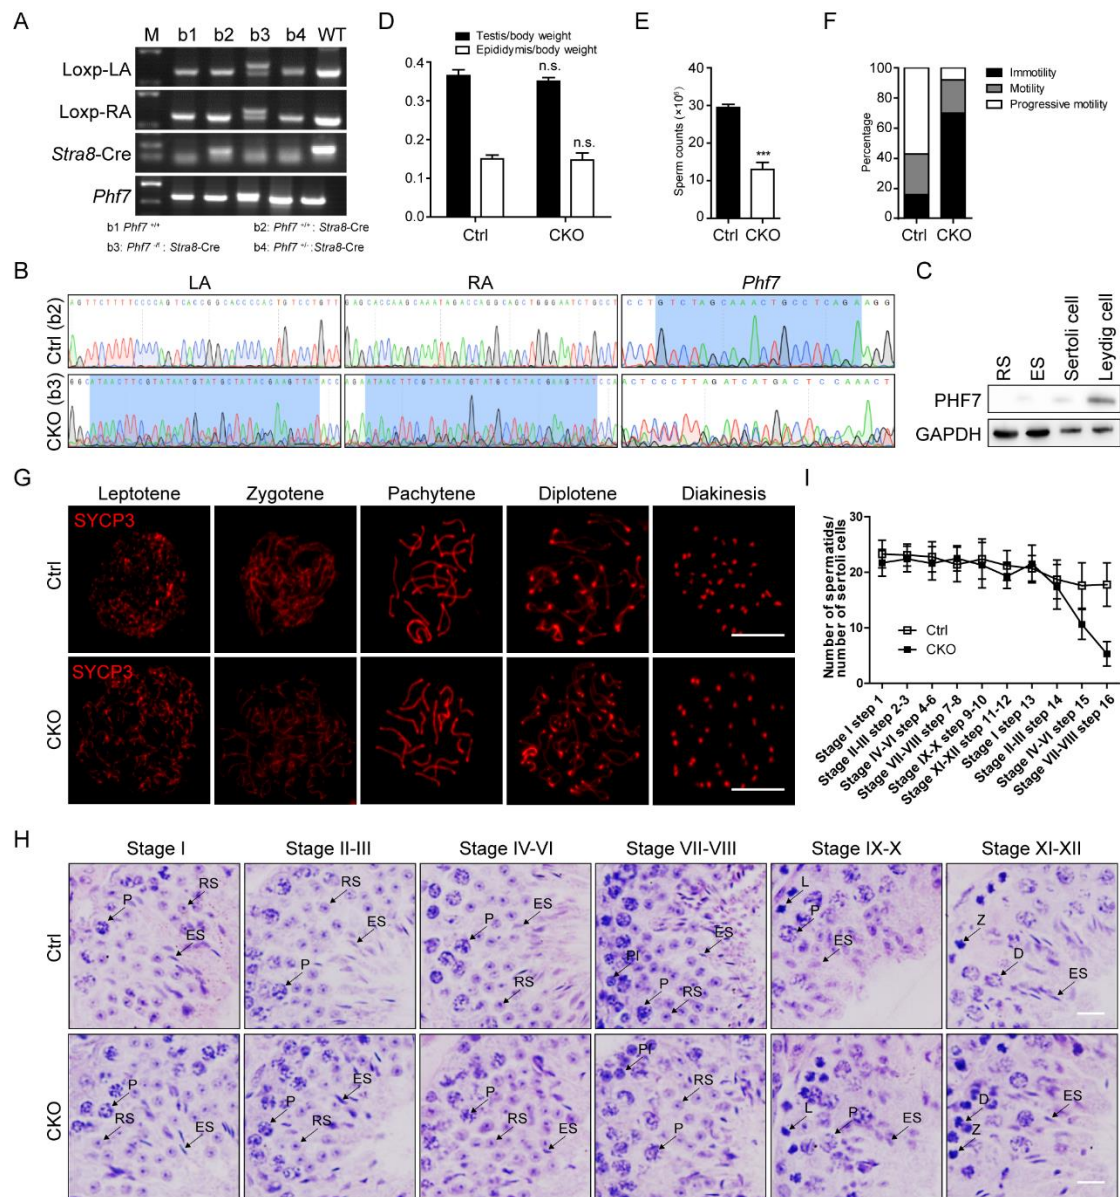**Figure S4. Generation and Characterization of Mice Carrying Mutant *Phf7* in Germ Cells.**

(A) PCR analysis of tail DNA from mice obtained by crossing *Phf7*-Loxp mice with *Stra8*-Cre mice. LA and RA represent the left and right arm of Loxp, respectively. b1, b2, b3, and b4 represent the different pups.



- (B) DNA sequences of PCR products (A) amplified from the LA, RA and *Phf7* locus in two mice (b2 and b3), respectively. Two peaks can be observed in the LA, RA and *Phf7* locus of mouse b3 (CKO), while only one peak is observed in mouse b2 (control).
- (C) Western blot of PHF7 in different testicular cells from mouse b3 (CKO). GAPDH is a loading control.
- (D) Comparison of the ratios of testis/body or epididymis/body weight between a 10-week-old CKO mouse (b3) and control littermate (b2). The average values  $\pm$  SD of three separate experiments are plotted. n.s., not significant.
- (E) Sperm counts in the cauda epididymis from 10-week-old CKO (b3) and control (b2) mice. \*\*\*,  $P < 0.001$ .
- (F) CASA analysis of immotility, motility, and progressive motility of sperm from 10-week-old CKO mice generated by *Stra8*-Cre.
- (G) SYCP3 antibody immunostaining (red) of meiotic chromosome spreads of spermatocytes from 10-week-old CKO mice carrying mutant *Phf7* in germ cells at different stages. Scale bar, 10  $\mu$ m.
- (H) H&E staining of testis sections from 8-week-old mice carrying mutant *Phf7* in germ cells. Stages of seminiferous epithelium cycles were determined by morphology of spermatocytes and round spermatids. PI, preleptotene; L, leptotene; Z, zygotene; P, pachytene; D, diplotene; RS, round spermatids; ES, elongating spermatids. Scale bar, 20  $\mu$ m.
- (I) A reduced number of spermatids was observed in mice carrying mutant *Phf7* in germ cells. Ratios between spermatids and Sertoli cells in tubule cross sections of specific stages of seminiferous epithelial cycles and corresponding spermatid development steps are shown.

**Figure S5.**

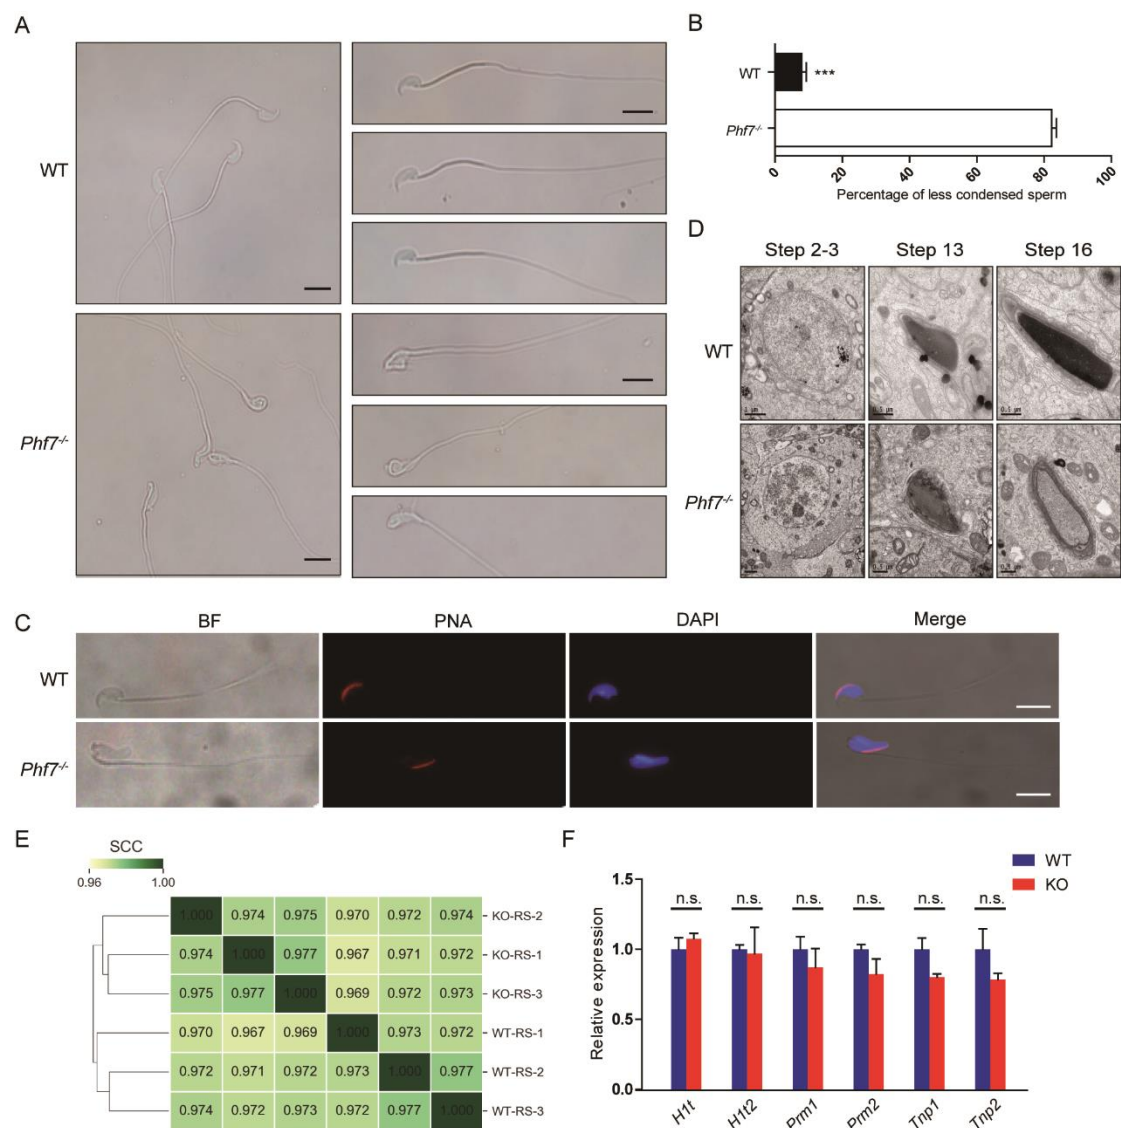

**Figure S5. Abnormal Chromatin Compaction in *Phf7* Mutant Sperm and The Transcriptional Profile of WT and *Phf7* Knockout Round Spermatids.**

- (A) Sperms from *Phf7*<sup>-/-</sup> mice showed abnormal morphology in head. Representative differential interference contrast (DIC) images of sperm from 8-week-old mutant (bottom) and WT (upper) mice. Scale bar, 10  $\mu$ m.
- (B) Quantification of sperm with less condensed nuclei in *Phf7*<sup>-/-</sup> and WT males.

n=100 per group; the average values  $\pm$  SD of three separate experiments are plotted. \*\*\*,  $P < 0.001$ .

- (C) Immunostaining of PNA in sperm isolated from WT and *Phf7* knockout epididymes. Sperm were stained with PNA (red) to indicate acrosome formation. Nuclei were stained with DAPI (blue). Scale bar, 10  $\mu$ m.
- (D) Representative transmission electron micrograph images of mutant and WT spermatids at different stages from 10-week-old mice. Chromatin condensation in *Phf7*<sup>-/-</sup> spermatids gradually becomes defective from step 13 to 16.
- (E) Clustered correlation heatmap of *Phf7* knockout and WT RNA-seq samples (three replicates per condition). Spearman correlation coefficients were calculated based on the expression values (FPKM) of all RefSeq annotated genes.
- (F) Quantitative PCR analysis of histone-to-protamine exchange related genes from WT and *Phf7* knockout round spermatids. \*\*\*,  $P < 0.001$ . n.s., not significant.

Figure S6.

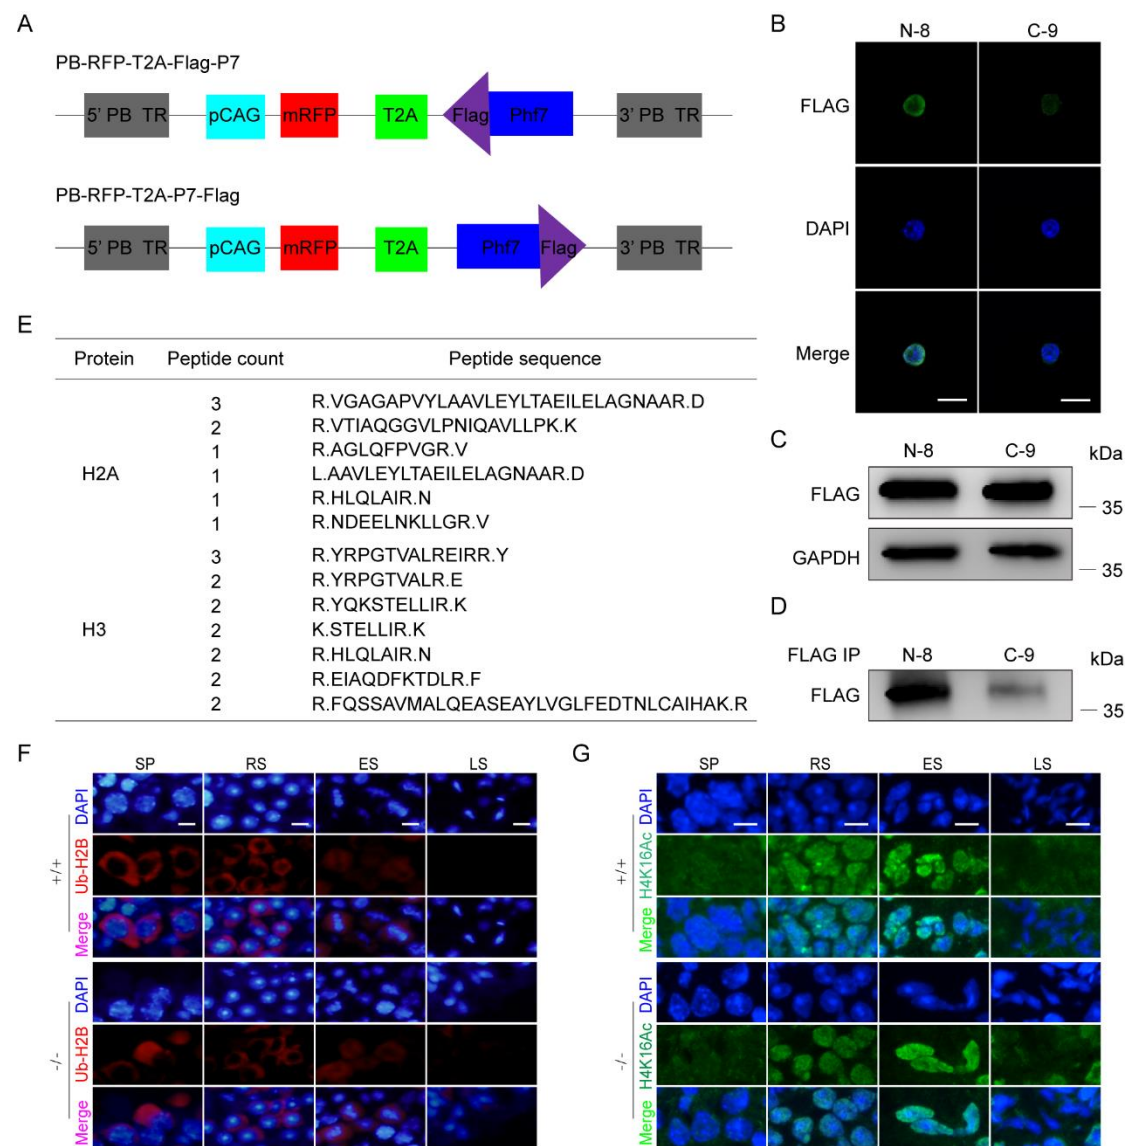

Figure S6. Generation of PHF7 Transgenic Cell Lines and Functional Analysis of *Phf7* Knockout Spermatids.

(A) The schematic of the plasmids constructed for the generation of transgenic haESC lines stably expressing N- or C- terminal Flag-tagged PHF7. Top, PB-RFP-T2A-Flag-Phf7 vector for expressing N-terminal Flag-tagged PHF7. Bottom, PB-RFP-T2A-Phf7-Flag vector for expressing C-terminal Flag-tagged PHF7.

- (B) Immunofluorescent analysis of expressed PHF7 using Flag antibody (green), showing nuclear localization of PHF7 in transgenic cells. Nuclei were stained with DAPI (blue). N-8 or C-9 represents cells carrying PB-RFP-T2A-Flag-Phf7 or PB-RFP-T2A-Phf7-Flag transgenes, respectively. Scale bar, 10  $\mu$ m.
- (C) Western blot analysis of PHF7 expression in two transgenic cell lines (N-8 and C-9) using Flag antibody, with GAPDH as a loading control.
- (D) Immunoprecipitation (IP) analysis in two transgenic cell lines using anti-Flag beads. Anti-Flag IP pellets were immunoblotted by anti-Flag antibody.
- (E) Mass spectrum (MS) analysis of IP pellets in (D). The table shows the detected peptides sequences from proteomic analysis of the IP pellet from N-8.
- (F) Immunostaining of ub-H2B (red) in testis sections from 8-week-old *Phf7* knockout and WT males. Nuclei were stained with DAPI (blue). Scale bar, 10  $\mu$ m.
- (G) Immunostaining of H4K16Ac (green) in testis sections from 8-week-old *Phf7* knockout and WT males. Nuclei were stained with DAPI (blue). Scale bar, 10  $\mu$ m.



**Figure S7.**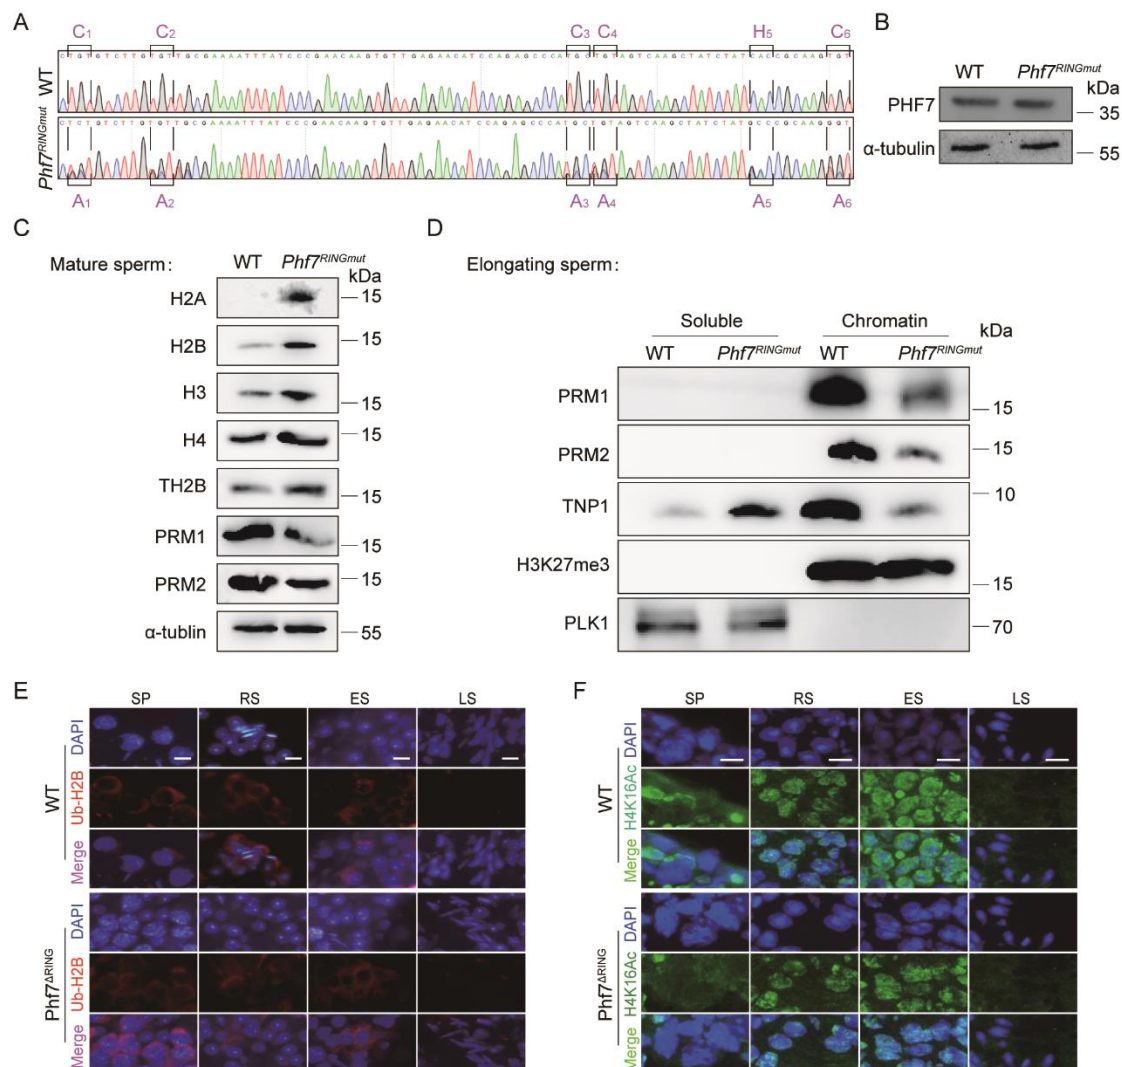**Figure S7. Function Analysis of PHF7 with a Mutant RING Domain *in vitro* and *in vivo*.**

- (A) DNA sequence of PCR products amplified from the *Phf7* RING domain.
- (B) Western blot analysis of PHF7 expression in haploid spermatids from 8-week-old *Phf7*<sup>RINGmut</sup> and WT mice, with  $\alpha$ -tubulin as a loading control.
- (C) Western blot analysis of histones and protamines in mature sperm from the

epididymes of 12-week-old *Phf7*<sup>RINGmut</sup> and WT mice, with  $\alpha$ -tubulin as a loading control.

- (D) Western blot analysis of protamines and transition protein (TNP1) in soluble or chromatin-bound in elongating spermatids from 8-week-old *Phf7*<sup>RINGmut</sup> and WT mice. PLK1 and H3K27me3 served as controls for soluble and chromatin fractions, respectively.
- (E) Immunostaining of ub-H2B (red) in testis sections from an 8-week-old *Phf7* mouse carrying mutant RING domain (*Phf7*<sup>RINGmut</sup>). Nuclei were stained with DAPI (blue). Scale bar, 10  $\mu$ m.
- (F) Immunostaining of H4K16Ac (red) in testis sections from an 8-week-old *Phf7* mouse carrying mutant RING domain (*Phf7*<sup>RINGmut</sup>). Nuclei were stained with DAPI (blue). Scale bar, 10  $\mu$ m.

**Figure S8.**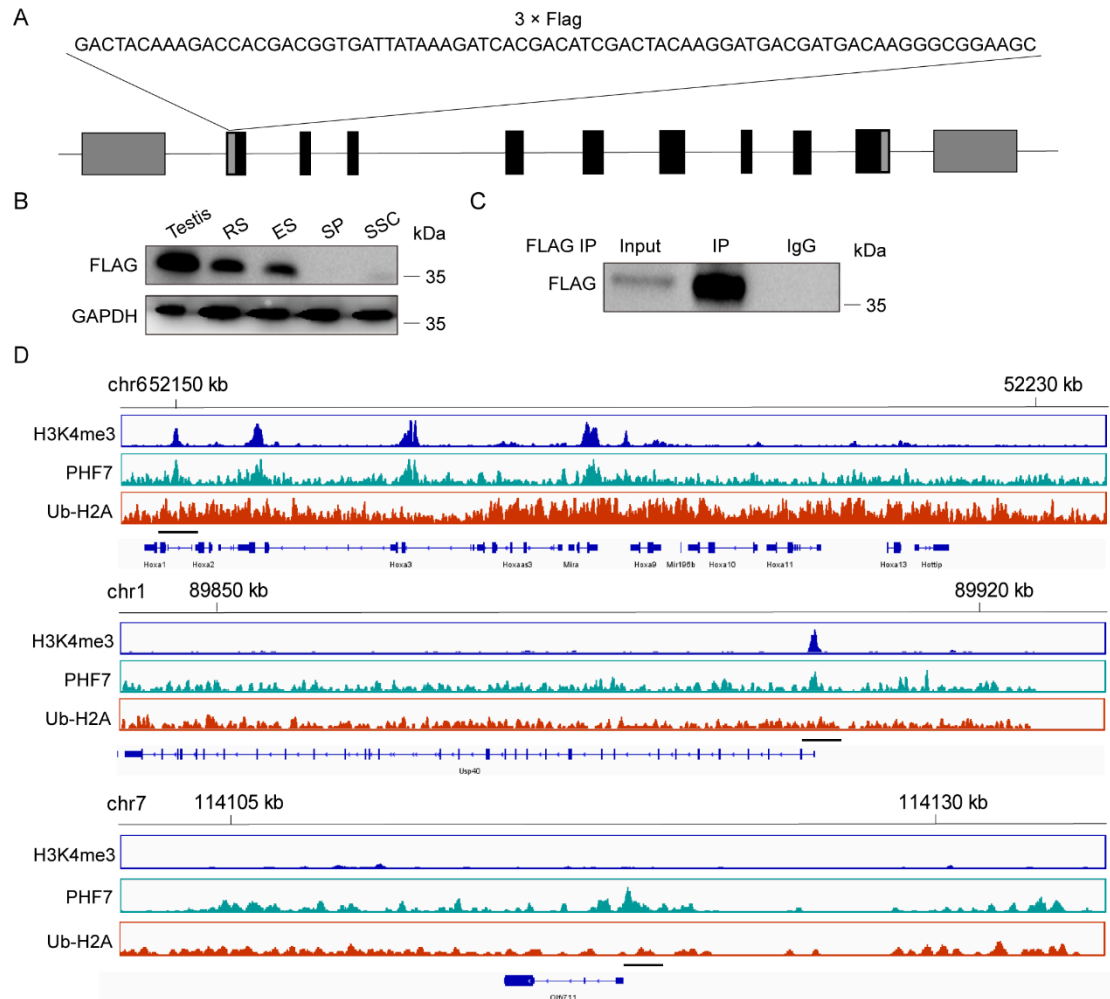**Figure S8. Generation and Characterization of *Phf7*-flag Knockin Mice.**

- (A) A schematic diagram illustrating the knockin position of the *Flag* sequence. The 3 × *Flag* was knocked into the N-terminus of *Phf7*.
- (B) Western blot analysis of PHF7 in different testicular cells of knockin mice, showing specific expression of PHF7 in round spermatids (RS) and elongating sperm (ES). GAPDH served as a loading control.
- (C) Immunoprecipitation (IP) analysis in Flag-knockin spermatids using anti-Flag beads. Flag-IP pellets were immunoblotted by anti-Flag antibody. Left lane, input load represents 10% of total. Middle lane, Flag IP pellets. Right lane, IgG IP as a negative control.

(D) Representative peaks overlapping with H3K4me3 and PHF7 in three gene loci from ChIP-seq. Top, *Hoxa* cluster; an example of peaks overlapping with H3K4me3 and PHF7. The region enriched with ub-H2A around the TSS is underlined. Middle, *Usp40* locus; an example of a peak unique to H3K4me3. Ub-H2A is less enriched in the underlined region. Bottom, *Olfir711* locus; an example of a peak unique to PHF7. Ub-H2A is less enriched in the underlined region..

**Figure S9.**

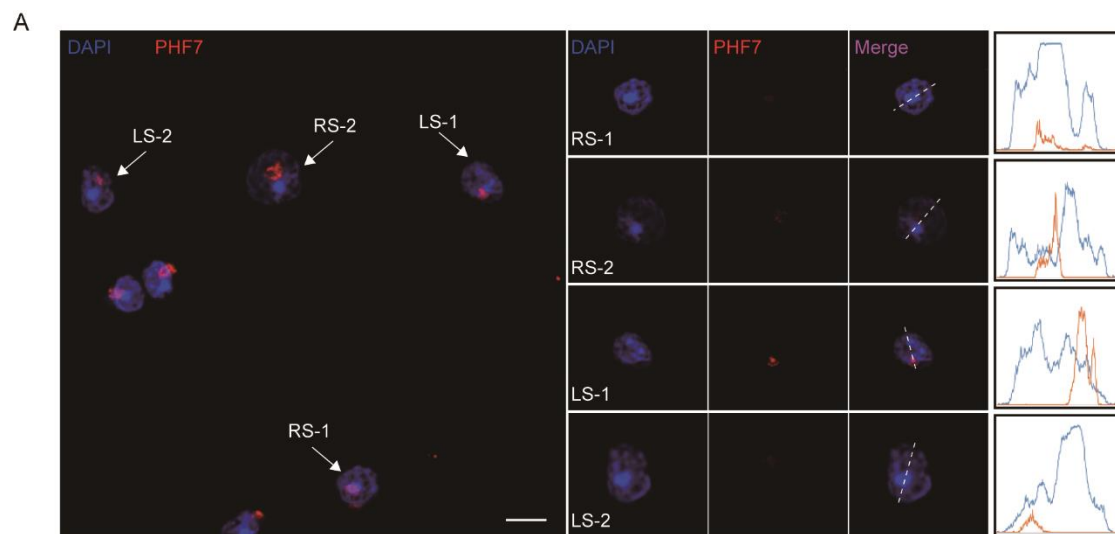

**Figure S9. The nuclear localization of PHF7 in spermatids.**

(A) Immunofluorescent images of spermatids stained for PHF7 (red) isolated from 8-week-old WT mice. Nuclei are counterstained by DAPI (blue). Arrows in the left image indicate round spermatids (RS) and late spermatids (LS) that are magnified in right lanes. Right lanes, areas of co-localization of red and blue signals are shown by line intensity. Scale bar, 10  $\mu$ m.



Table S1. Summary of ROSI experiments

| Round<br>spermatids       | No. of 2-cell Embryo<br>Transfer | No. of Pups | Birth Rate (%) |
|---------------------------|----------------------------------|-------------|----------------|
| WT                        | 146                              | 45          | 30.28          |
| <i>Phf7<sup>-/-</sup></i> | 86                               | 28          | 32.56          |

Table S2. *In vitro* Development of Embryos by ICSI

| Sperm                     | No. of<br>oocytes | No. of 2-cell<br>embryos | No. of<br>blastocysts | Rate of 2-<br>cell (%) | Rate of<br>blastocyst (%) |
|---------------------------|-------------------|--------------------------|-----------------------|------------------------|---------------------------|
| WT                        | 83                | 78                       | 40                    | 93.98                  | 51.28                     |
| <i>Phf7<sup>-/-</sup></i> | 93                | 61                       | 2                     | 65.59                  | 3.28                      |

Table S3. Key resource table

| REAGENT or RESOURCE                                  | SOURCE                                                       | IDENTIFIER                     |
|------------------------------------------------------|--------------------------------------------------------------|--------------------------------|
| <b>Antibodies</b>                                    |                                                              |                                |
| Rabbit polyclonal anti-PHF7                          | Abcam                                                        | ab179660                       |
| Rabbit polyclonal anti-RNF8                          | Proteintech                                                  | Cat#14112-1-AP                 |
| Rabbit polyclonal anti-TNP1                          | Proteintech                                                  | Cat#17178-1-AP;RRID:AB_2206757 |
| Goat polyclonal anti-PRM1                            | Santa Cruz                                                   | sc-23107; RRID:AB_2171310      |
| Goat polyclonal anti-PRM2                            | Santa Cruz                                                   | sc-23104; RRID:AB_2284440      |
| Mouse monoclonal anti-a-gapdh                        | Cell Signaling Technology                                    | # 2118                         |
| Mouse monoclonal anti-a-tubulin                      | Sigma                                                        | T6199                          |
| Mouse monoclonal anti-H3K4me1                        | Active motif                                                 | 39635                          |
| Mouse monoclonal anti-H3K4me2                        | Active motif                                                 | 39679                          |
| Mouse polyclonal anti-H3K4me3                        | Active motif                                                 | 39916                          |
| Mouse polyclonal anti-H3K27me3                       | Millipore                                                    | 07-449                         |
| Rabbit polyclonal anti-Plk1                          | Proteintech                                                  | 10305-1-AP                     |
| Rabbit polyclonal anti-H4K16Ac                       | Abcam                                                        | Ab109463                       |
| Mouse monoclonal anti-Ub                             | Santa Cruz                                                   | sc-8017; RRID: AB_628423       |
| Rabbit polyclonal anti-H2A                           | Cell Signaling Technology                                    | Cat#12349                      |
| Rabbit polyclonal anti-H2B                           | Cell Signaling Technology                                    | Cat#12364                      |
| Rabbit polyclonal anti-H3                            | Cell Signaling Technology                                    | Cat#9715; RRID:AB_331563       |
| Rabbit polyclonal anti-H4                            | Cell Signaling Technology                                    | Cat#13919                      |
| Rabbit polyclonal anti-ub-H2A                        | Millipore                                                    | Cat#ABE569                     |
| Rabbit polyclonal anti-ub-H2B                        | Cell Signaling Technology                                    | Cat#5546;RRID:AB_10693452      |
| Goat anti-rabbit poly-HRP                            | Thermo scientific                                            | 32260                          |
| Goat anti-mouse poly-HRP                             | Thermo scientific                                            | 32230                          |
| Mouse monoclonal anti-Mvh                            | Abcam                                                        | ab27591                        |
| Rabbit polyclonal anti-Sycp3                         | Abcam                                                        | ab15093                        |
| Rabbit polyclonal anti-γH2A.X                        | Abcam                                                        | ab11174                        |
| Mouse monoclonal anti-Flag                           | Sigma                                                        | Cat#F3165; RRID: AB_259529     |
| Rabbit polyclonal anti-GST                           | ABclonal Technology                                          | Cat#AE006                      |
| Mouse monoclonal anti-Streptavidin                   | Thermo scientific                                            | MA5-17282                      |
| <b>Chemicals, Peptides, and Recombinant Proteins</b> |                                                              |                                |
| Hematoxylin and Eosin                                | Shanghai hongqiao lexiang medical reagent technology co., LT | N/A                            |
| Dynabeads™ Protein G                                 | Thermo Fisher                                                | REF10004D                      |
| ANTI-FLAG M2 affinity gel                            | sigma                                                        | A2220                          |
| GST•Bind™ Resin                                      | millipore                                                    | 70541-5                        |

|                                                                     |                                  |              |
|---------------------------------------------------------------------|----------------------------------|--------------|
| Strep-Tactin® Sepharose® 50% suspension                             | IBA                              | 2-1201-025   |
| d-Desthiobiotin                                                     | sigma                            | D1411-500MG  |
| L-Glutathione reduced                                               | sigma                            | G4251-1G     |
| BugBuster® Master Mix                                               | millipore                        | 71456-3      |
| Histone H3 (1-21)                                                   | ANAspec                          | AS-61702     |
| H3K4me1 (1-21)                                                      | ANAspec                          | 64355-025    |
| H3K4me2 (1-21)                                                      | ANAspec                          | AS-64356-025 |
| H3K4me3 (1-21)                                                      | ANAspec                          | AS-64357-025 |
| Human, Recombinant Histone H2A                                      | New England BioLabs              | Cat#M2502S   |
| Human, Recombinant Histone H2B                                      | New England BioLabs              | Cat#M2505S   |
| UbcH5a                                                              | Boston Biochem                   | Cat#E2-616   |
| UbcH5c                                                              | Boston Biochem                   | Cat#E2-802   |
| GST                                                                 | Purification                     | N/A          |
| GST-PHF7                                                            | Purification                     | N/A          |
| GST-PHF7 <sup>ΔRING</sup>                                           | Purification                     | N/A          |
| His-RNF8                                                            | Purification                     | N/A          |
| Strep-PHF7                                                          | Purification                     | N/A          |
| Strep-PHF7 <sup>ΔRING</sup>                                         | Purification                     | N/A          |
| Strep-PHF7 <sup>ΔPHD</sup>                                          | Purification                     | N/A          |
| Strep-PHF7 <sup>ΔRINGΔPHD</sup>                                     | Purification                     | N/A          |
| Critical Commercial Assays                                          |                                  |              |
| QIAquick PCR purification Kit                                       | Qiagen                           | Cat#28104    |
| MEGAclear™ Kit Purification for Large Scale Transcription Reactions | Life Technologies                | AM1908       |
| MEGAscript™ Kit                                                     | Life Technologies                | AM1354       |
| mMESSAGE mMACHINE® T7 Ultra Kit                                     | Life Technologies                | AM1345       |
| NEBNext Ultra DNA Library Prep Kit for Illumina                     | NEB                              | E7370        |
| MEGAclear™ Kit Purification for Large Scale Transcription Reactions | Life Technologies                | AM1908       |
| Deposited Data                                                      |                                  |              |
| H3K4me3 ChIP-seq                                                    | This paper                       | GSE112912    |
| Ub-H2A ChIP-seq                                                     | This paper                       | GSE112912    |
| Phf7-flag ChIP-seq                                                  | This paper                       | GSE112912    |
| RNA-seq                                                             | This paper                       | GSE119701    |
| Experimental Models: Cell Lines                                     |                                  |              |
| HEK293T                                                             | American Type Culture Collection | N/A          |
| AG-haESCS                                                           | Zhong et al.,2016                | N/A          |
| Experimental Models: Organisms/Strains                              |                                  |              |
| Phf7 KO                                                             | This paper                       |              |

|                                                          |                      |     |
|----------------------------------------------------------|----------------------|-----|
| <i>Stra8</i> -Cre                                        | Robert et al.,2003   |     |
| <i>Amh</i> -Cre                                          | Patricia et al.,2008 |     |
| <i>Phf7</i> -loxP: <i>Stra8</i> -Cre                     | This paper           |     |
| <i>Phf7</i> -loxP: <i>Amh</i> -Cre                       | This paper           |     |
| <i>Phf7</i> -KI-flag                                     | This paper           |     |
| <i>Phf7</i> <sup>RINGmut</sup>                           | This paper           |     |
| Oligonucleotides                                         |                      |     |
| Test-PHF7-AF:<br>GATAGTTGCCAACAGTAGTG                    | This paper           | N/A |
| Test-PHF7-AR:<br>CTGTAGTCAGGAAGCATCTT                    | This paper           | N/A |
| Test-PHF7-BF:<br>ATACACAGATGAGTTCCACCAAG                 | This paper           | N/A |
| Test-PHF7-BR:<br>TCAAGGACACAAGCACATAGG                   | This paper           | N/A |
| <i>Phf7</i> -flag-check-F:<br>TCTCTAACTCAGTCTCCTCAA      | This paper           | N/A |
| <i>Phf7</i> -flag-check-R:<br>TCACCTACTCTACCTCAATCT      | This paper           | N/A |
| <i>Phf7</i> -CDS-F:<br>AAGACTTTAAAAGAAAAAACA<br>CATCCAAG | This paper           | N/A |
| <i>Phf7</i> -CDS-R:<br>TTAACTCGTGGTTGAAGCAGGC            | This paper           | N/A |
| <i>Phf7</i> -LOXP-Genotyping-AF:<br>AGTGCTGGTGTATCCAATT  | This paper           | N/A |
| <i>Phf7</i> -LOXP-Genotyping-AR:<br>CACACGGATTCTGAACATG  | This paper           | N/A |
| <i>Phf7</i> -LOXP-Genotyping-BF:<br>GCTGCTCATAACTGAATAGG | This paper           | N/A |
| <i>Phf7</i> -LOXP-Genotyping-BR:<br>GGCTCTGGATGTTCTCAA   | This paper           | N/A |
| Recombinant DNA                                          |                      |     |
| pMD19T-PHF7-CDS                                          | This paper           | N/A |
| PB-RFP-T2A-flag-PHF7                                     | This paper           | N/A |
| PB-RFP-T2A -PHF7-flag                                    | This paper           | N/A |
| pGEX6P-1-PHF7                                            | This paper           | N/A |
| pET-51b-PHF7                                             | This paper           | N/A |
| pET-51b-RNF8                                             | This paper           | N/A |
| pGEX6P-1-PHF7 <sup>ΔRING</sup>                           | This paper           | N/A |
| pET-51b-PHF7 <sup>ΔRING</sup>                            | This paper           | N/A |
| pET-51b-PHF7 <sup>ΔPHD</sup>                             | This paper           | N/A |
| pET-51b-PHF7 <sup>ΔRINGΔPHD</sup>                        | This paper           | N/A |

| Software and Algorithms |                       |                                                                                                           |
|-------------------------|-----------------------|-----------------------------------------------------------------------------------------------------------|
| ImageJ                  | N/A                   | <a href="https://imagej.nih.gov/ij/download.html">https://imagej.nih.gov/ij/download.html</a>             |
| FlowJo V10.2            | N/A                   | <a href="https://www.flowjo.com/">https://www.flowjo.com/</a>                                             |
| GraphPad Prism          | N/A                   | <a href="https://www.graphpad.com/">https://www.graphpad.com/</a>                                         |
| Python 2.7              | N/A                   | <a href="https://www.python.org/download/releases/2.7/">https://www.python.org/download/releases/2.7/</a> |
| macs2 version 1.3.7.1   | Zhang et al., 2008    | <a href="https://github.com/taoliu/MACS">https://github.com/taoliu/MACS</a>                               |
| Bowtie version 1.2.1.1  | Langmead et al., 2009 | <a href="http://bowtie-bio.sourceforge.net/index.shtml">http://bowtie-bio.sourceforge.net/index.shtml</a> |
